# Supplementary material
Source: PubMed Central journal article supplement (PMC2651314)
Supplement: 0813210106_0813210106SI.pdf [file 0813210106_0813210106SI.pdf]

# Supporting Information

Kawauchi *et al.* 10.1073/pnas.0813210106

## SI Materials and Methods

**Animals.** Female 10-week-old C57BLK/ksj *db/db* mice were obtained from CLEA Japan Inc. (Tokyo, Japan). Animal experiments were reviewed by the Ethics Committee on Animal Experiments of Nippon Medical School and were carried out in accordance with the Guidelines for Animal Experiments of Nippon Medical School and the guidelines of The Law and Notification of the Government.

**In Vitro OGT Assay.** HA-tagged IKK $\beta$  was recovered from the cell extract by immunoprecipitation, and the precipitant was washed twice with the buffer (25 mM Hepes pH 7.2, 150 mM CH<sub>3</sub>COOK, 2 mM EDTA, 0.1% Nonidet P-40 and protease inhibitor mixture) and three times with OGT assay buffer (50 mM sodium cacodylate pH 6.0 and 1 mg/ml BSA [BSA; Nacalai Tesque, Kyoto, Japan]). The crude OGT sample was prepared from the extract of mouse brain tissue. Brain nucleosol was obtained and desalted as previously described (1–2). The desalted nucleosol was dissolved with OGT buffer and incubated

with the immune complexes at room temperature for 40 min in the presence or absence of 10 mM UDP-GlcNAc (Sigma, St Louis, MO). After the reaction, the complex was washed twice with OGT buffer and subjected to SDS/PAGE.

**RT-PCR and Quantitative Real-Time PCR.** Total RNA was extracted using a DNA-free kit (Qiagen) and purified using an RNeasy kit (Qiagen). cDNA was prepared using oligo (dT), random primers and superScript III (Invitrogen). Quantitative real-time PCR analysis was performed using a TaqMan Probe Mix (Applied Biosystems) under the following conditions: 20 sec at 95 °C, followed by 40 cycles of 95 °C for 1 sec and 60 °C for 20 sec using an Applied Biosystems StepOne™. The primer and probe sets used were predesigned primer/probe sets for mouse OGT,  $\beta$ -actin are commercially available (OGT, Mm00507317 m1,  $\beta$ -actin, Mm 00607939 s1), with all primers and probes synthesized. Data show mRNA expression levels relative to those of  $\beta$ -actin; the former was then normalized to control expression levels for each experiment.

1. Okuyama R, Marshall S (2003) UDP-N-acetylglucosaminyl transferase (OGT) in brain tissue: Temperature sensitivity and subcellular distribution of cytosolic and nuclear enzyme. *J Neurochem* 86:1271–1280.

2. Marshall S, Duong T, Orbus RJ, Rumberger JM, Okuyama R (2003) Measurement of UDP-N-acetylglucosaminyl transferase (OGT) in brain cytosol and characterization of anti-OGT antibodies. *Anal Biochem* 314:169–179.

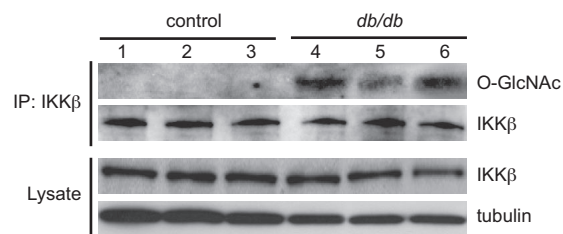

**Fig. S1.** IKK $\beta$  is modified with O-GlcNAc under hyperglycemia. The level of IKK $\beta$  O-GlcNAcylation was examined in the liver of diabetic *db/db* mice ( $n = 3$ ; Lanes 4–6) or control C57BL mice ( $n = 3$ ; Lanes 1–3). Tubulin was used as a loading control.

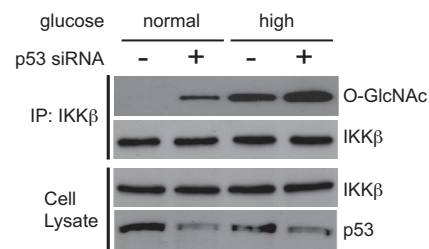

**Fig. S2.** p53 knockdown in HepG2 cells enhances IKK $\beta$  O-GlcNAcylation. HepG2 cells were infected with control- or p53-siRNA-expressing retroviruses. The cells were incubated in normal medium (5.6 mM) or high glucose medium (30 mM) for 3 h. The level of IKK $\beta$  O-GlcNAcylation was examined by immunoblot analysis.

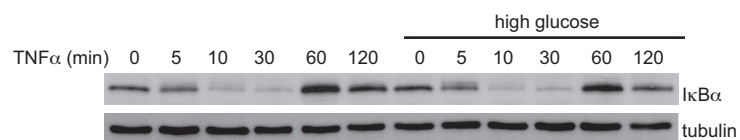

**Fig. S3.** Re-synthesis of I $\kappa$ B $\alpha$  is remarkably induced at 60 min after stimulation in HepG2 cells. HepG2 cells were incubated in normal medium (5.6 mM) or high glucose medium (30 mM) for 3 h and stimulated with TNF $\alpha$  (100 ng/ml) for the indicated periods. The cell extracts were subjected to immunoblot analysis with an anti-I $\kappa$ B $\alpha$  antibody (*Top*). Tubulin was used as a loading control (*Bottom*).



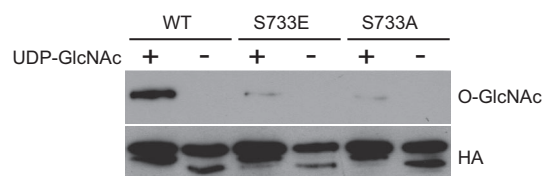

**Fig. S5.** IKK $\beta$  at Ser 733 is O-GlcNAcylated in vitro. NIH 3T3 cells infected with mouse IKK $\beta$  siRNA-expressing retrovirus were superinfected with retroviruses encoding HA-tagged human IKK $\beta$  WT, S733E, or S733A mutants. The in vitro OGT assay was performed using crude OGT from mouse brain nucleosol, which was reacted with immunoprecipitated HA-IKK $\beta$  as a substrate in the presence of UDP-GlcNAc.

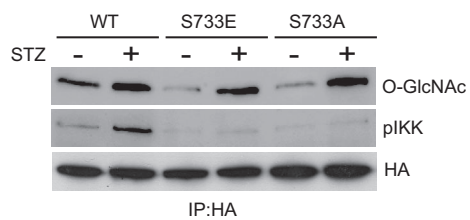

**Fig. S6.** Activating phosphorylation of IKK $\beta$  Ser 733 mutants is not induced by STZ. NIH 3T3 cells infected with mouse IKK $\beta$  siRNA-expressing retrovirus were superinfected with retroviruses encoding HA-tagged human IKK $\beta$  WT, S733E, or S733A mutants. The cells were treated with STZ (5 mM) for 3 h. The levels of IKK $\beta$  O-GlcNAcylation and IKK $\alpha/\beta$  phosphorylation were examined by immunoblot analysis.

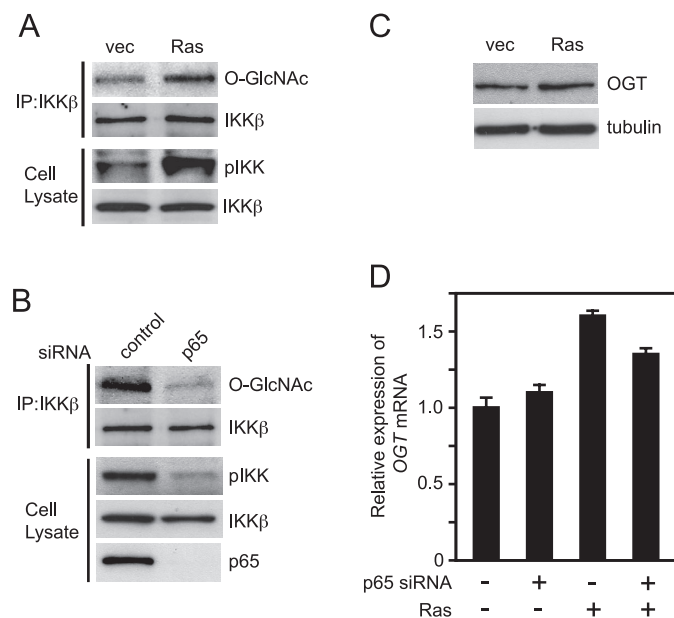

**Fig. S7.** O-GlcNAcylation of IKK $\beta$  in  $p53^{-/-}$  MEFs is enhanced by Ha-RasV12-introduction. (A) The level of IKK $\beta$  O-GlcNAcylation was examined in  $p53^{-/-}$  MEFs infected with retroviruses encoding activated Ha-RasV12 (Ras) or empty vector (vec). (B) The cell extracts were prepared from  $p53^{-/-}$  MEFs infected with Ha-RasV12- and control or p65 siRNA-expressing retroviruses and subjected to immunoprecipitation (IP) with an anti-IKK $\beta$  antibody, followed by immunoblot analysis with an anti-O-GlcNAc antibody. The cell extracts were subjected to immunoblot analysis with an anti-phospho-IKK (pIKK) antibody. (C) The cell extracts from  $p53^{-/-}$  MEFs infected with control or an Ha-RasV12-expressing retrovirus were subjected to immunoblot analysis with an anti-OGT antibody. (D)  $p53^{-/-}$  MEFs were infected with control- or p65-siRNA-expressing retroviruses together with an Ha-RasV12-expressing retrovirus. The expression of OGT was examined by quantitative real-time PCR.

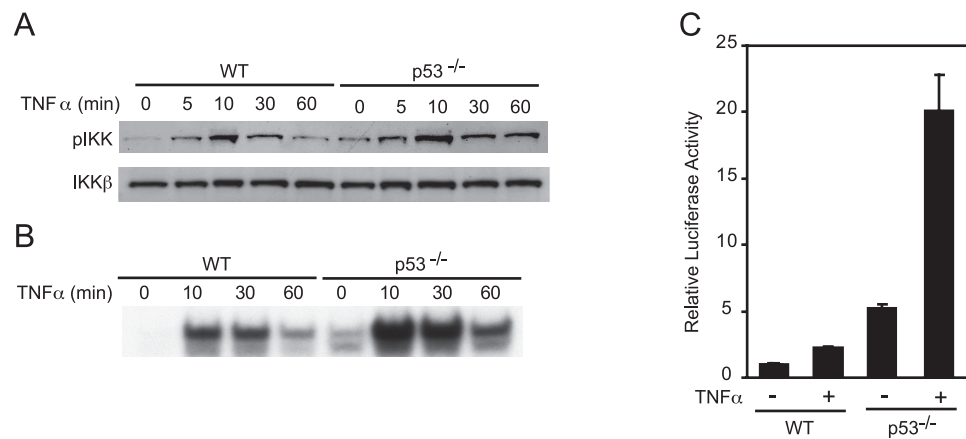

**Fig. S8.** *p53* $^{-/-}$  MEFs exhibit increased NF- $\kappa$ B activity induced by TNF $\alpha$ . (A and B) Wild-type and *p53* $^{-/-}$  MEFs were treated with TNF $\alpha$  (100 ng/ml) for the indicated periods. (A) The phosphorylation of IKK $\alpha/\beta$  was examined by immunoblot analysis. (B) Nuclear extracts were subjected to EMSA using a radiolabeled- $\kappa$ B oligonucleotide probe. (C) Wild-type and *p53* $^{-/-}$  MEFs were transfected with the NF- $\kappa$ B Luc reporter plasmid and pRL-TK. The transfected cells were treated with TNF $\alpha$  for 6 h before harvesting. The luciferase activity is shown normalized to Renilla luciferase activity. Data are means  $\pm$  SD, from three independent experiments.
